# Supplementary figures and images for: Decoding temporal interpretation of the morphogen Bicoid in the early Drosophila embryo
Source: eLife journal article supplement (doi:10.7554/elife.26258), 2017-07-10

A

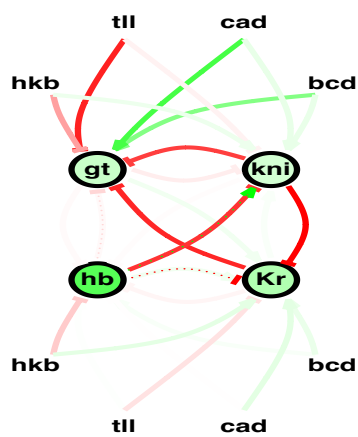

C

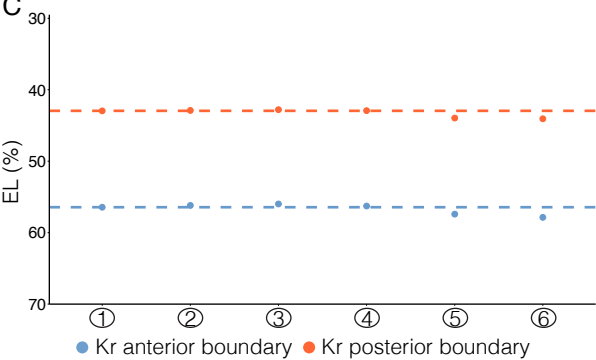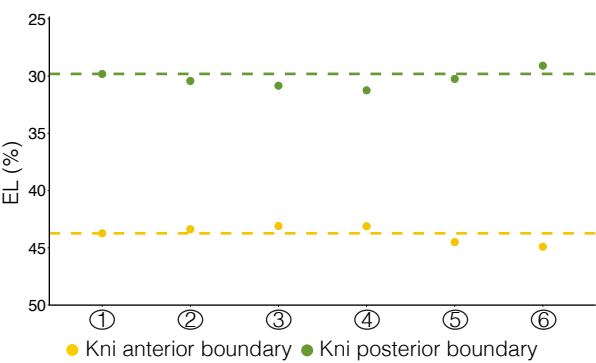

E

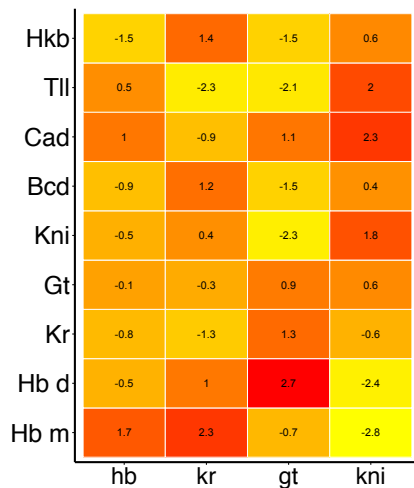

B

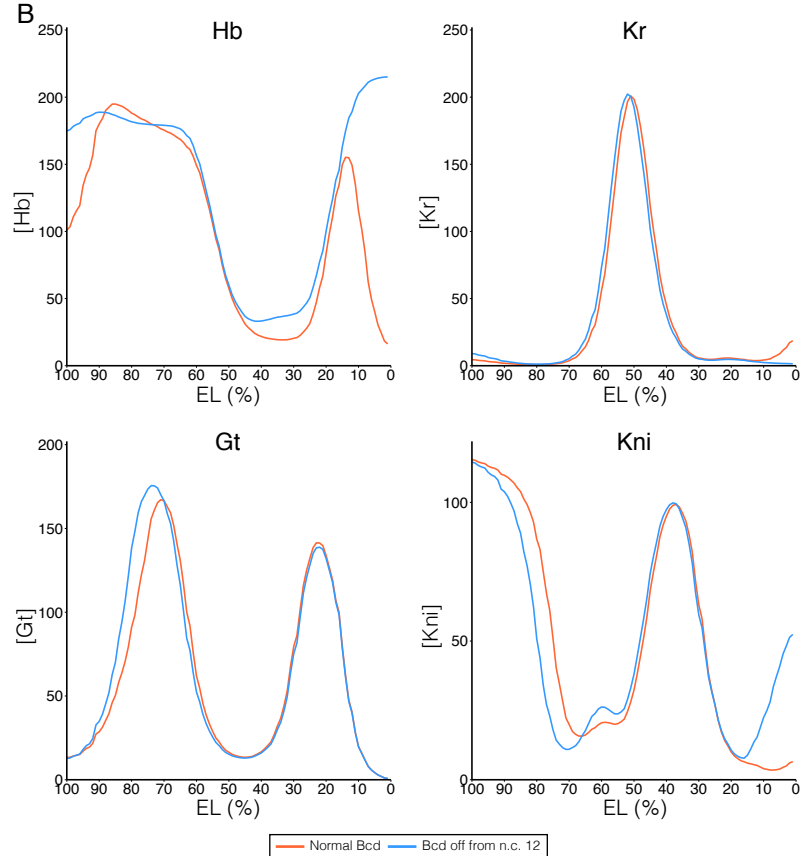

D

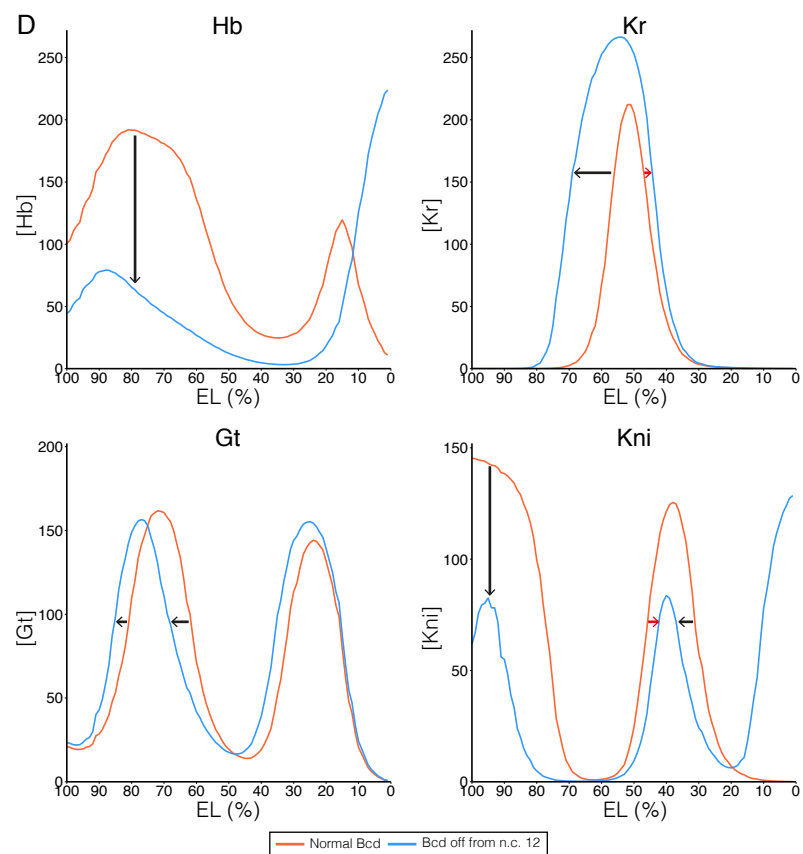

Supplement: supp [file elife-26258-supp-v1.zip]

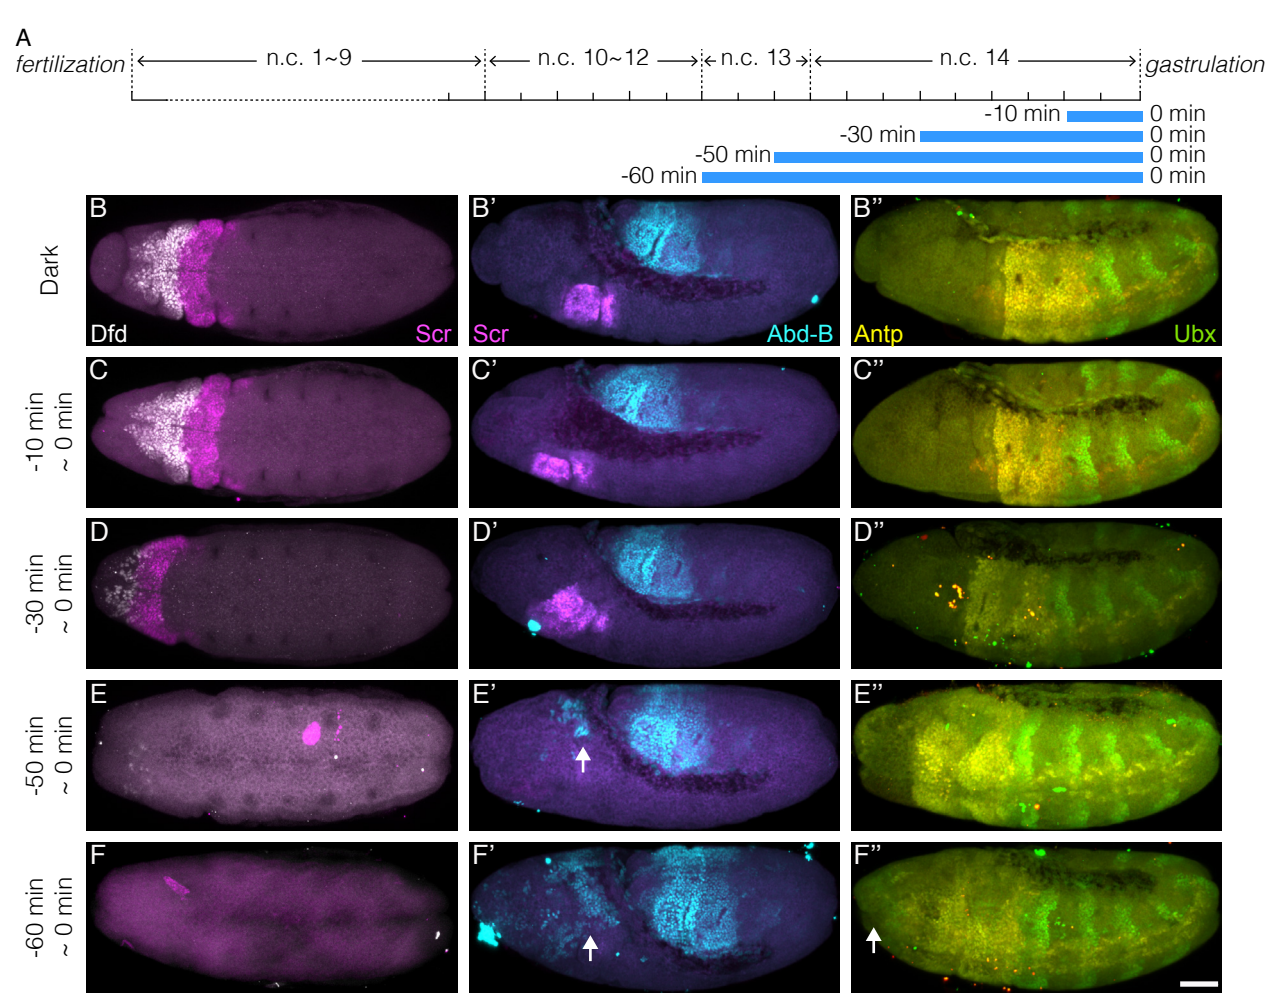

Supplement: supp [file elife-26258-supp-v1.zip]

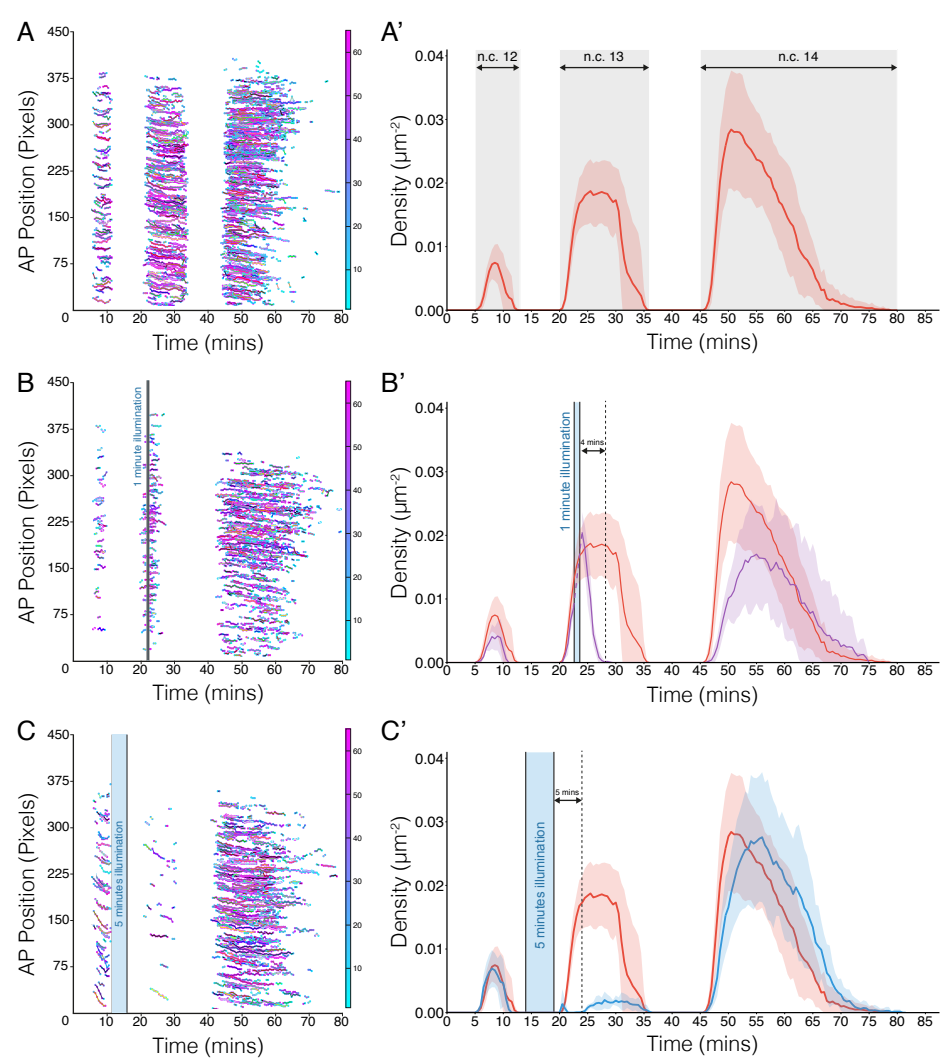

Supplement: supp [file elife-26258-supp-v1.zip]

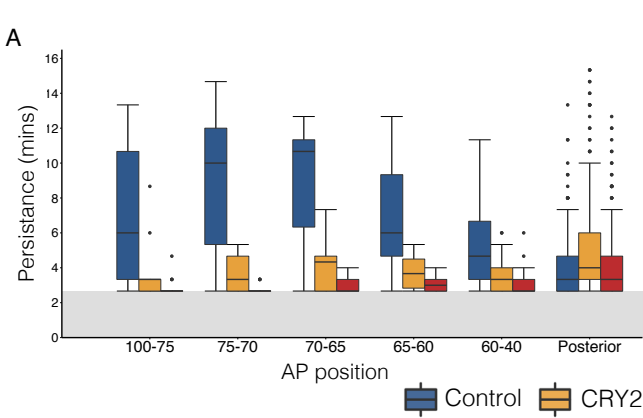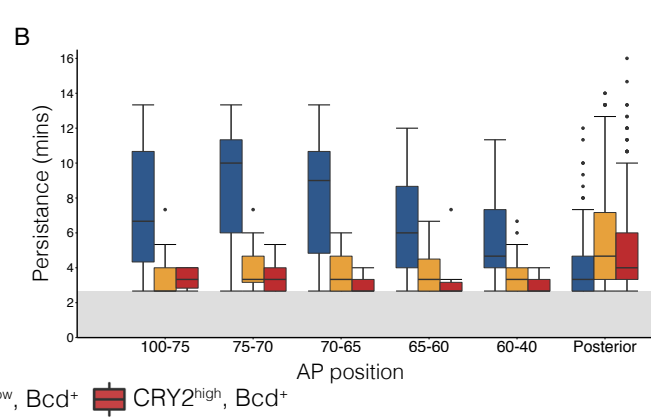

Supplement: supp [file elife-26258-supp-v1.zip]

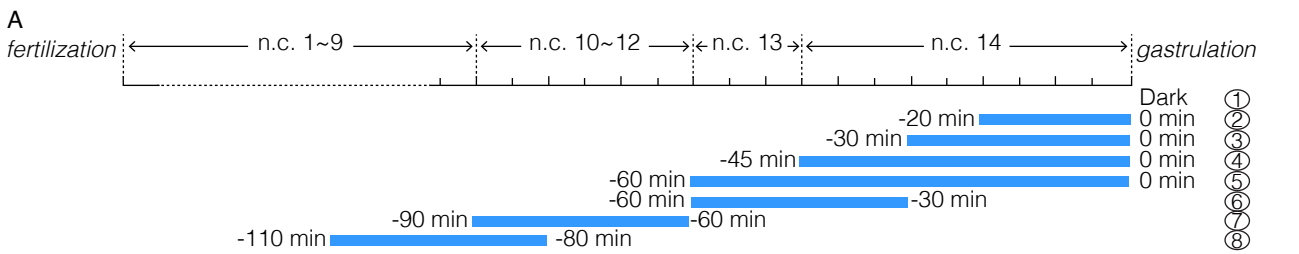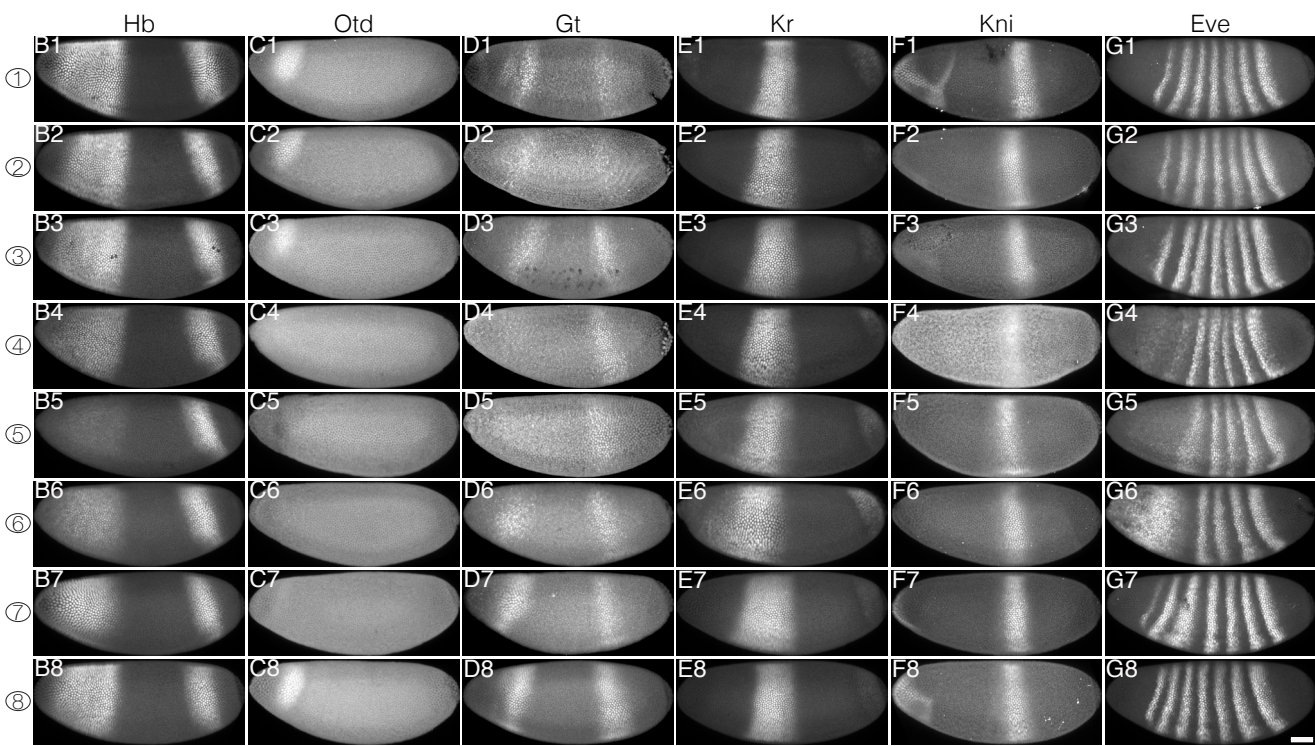

Supplement: supp [file elife-26258-supp-v1.zip]

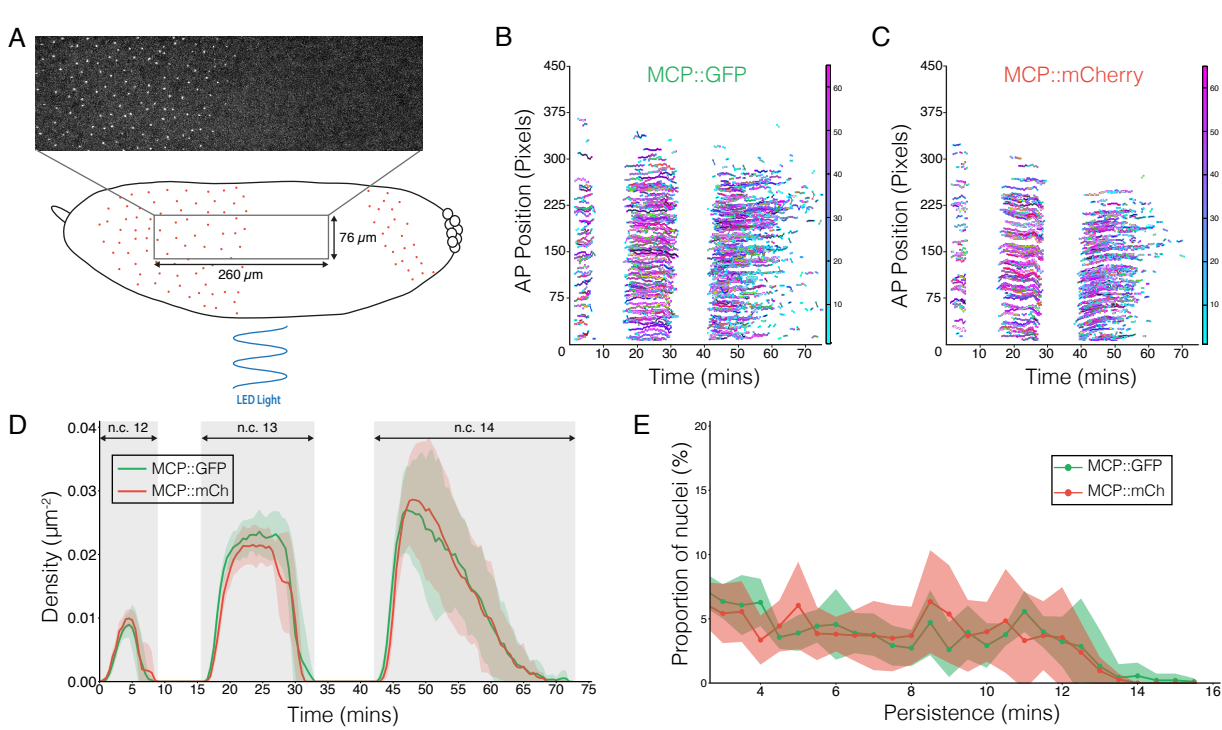

Supplement: supp [file elife-26258-supp-v1.zip]

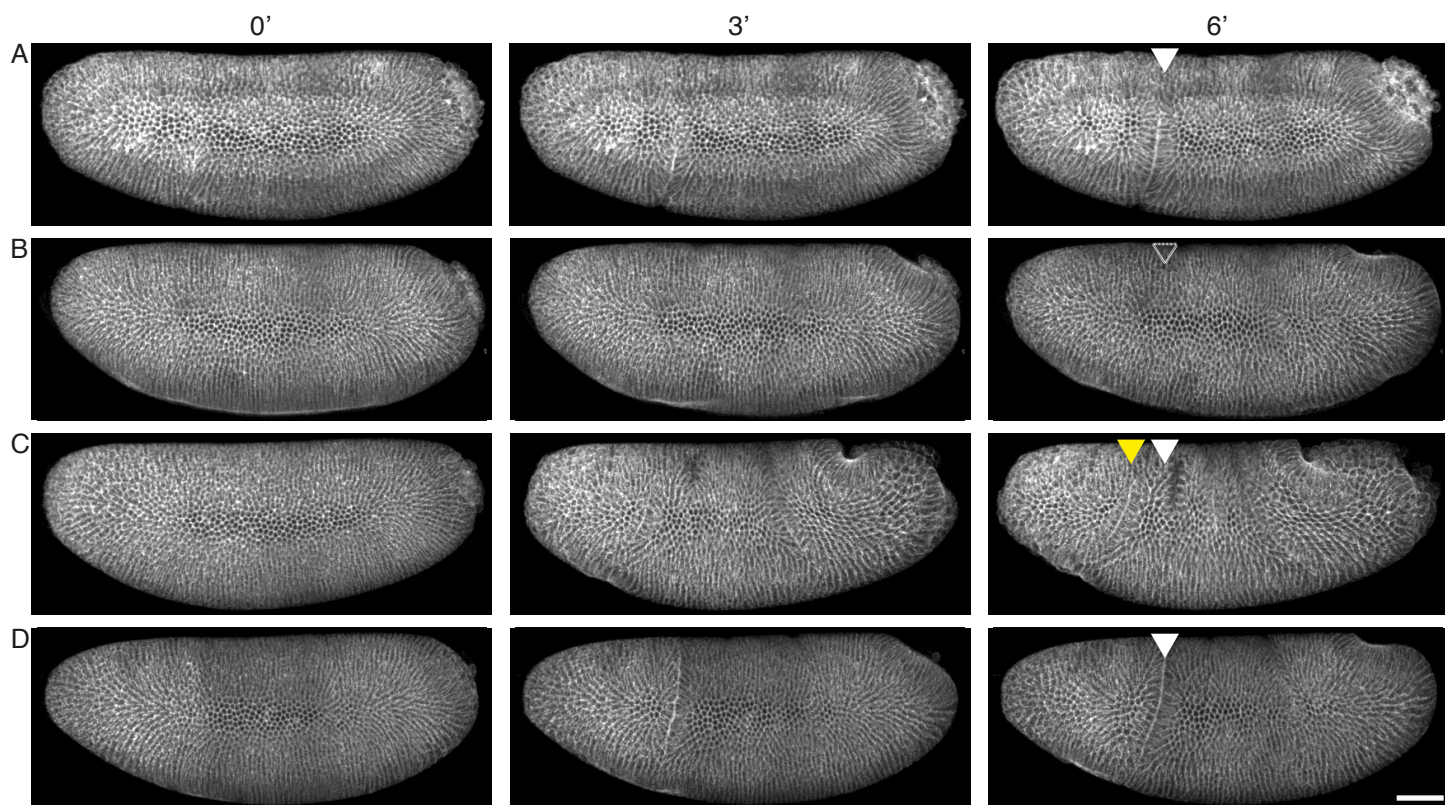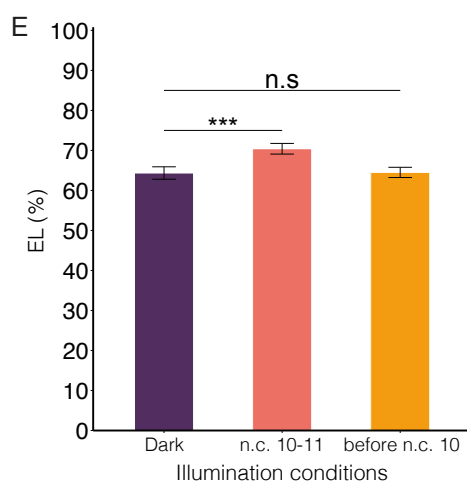

Supplement: supp [file elife-26258-supp-v1.zip]

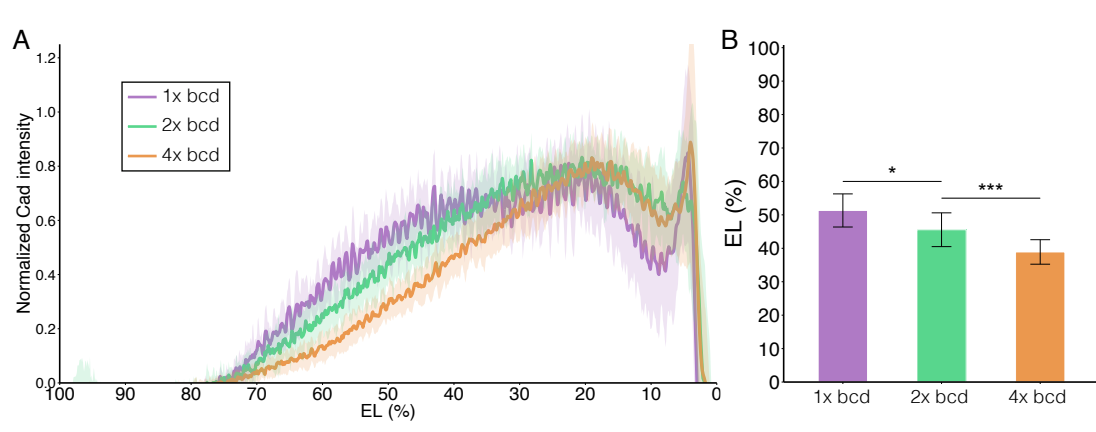

Supplement: supp [file elife-26258-supp-v1.zip]

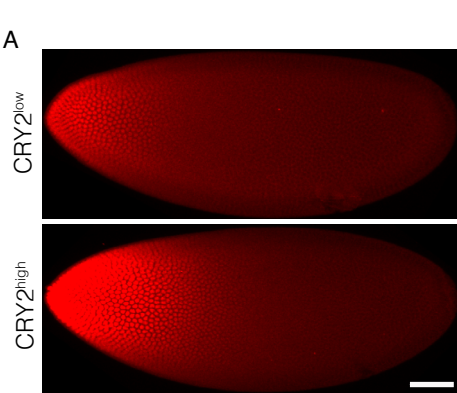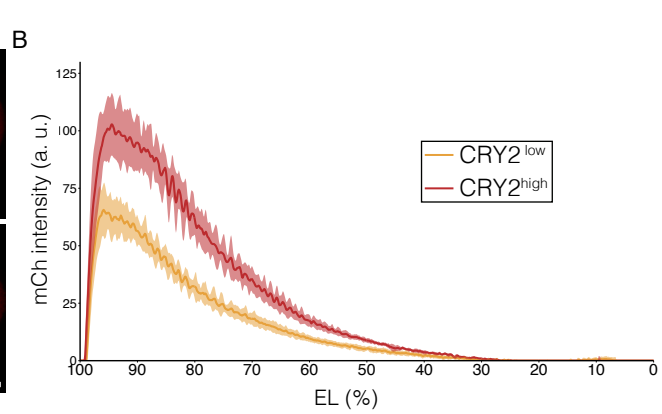

Supplement: supp [file elife-26258-supp-v1.zip]

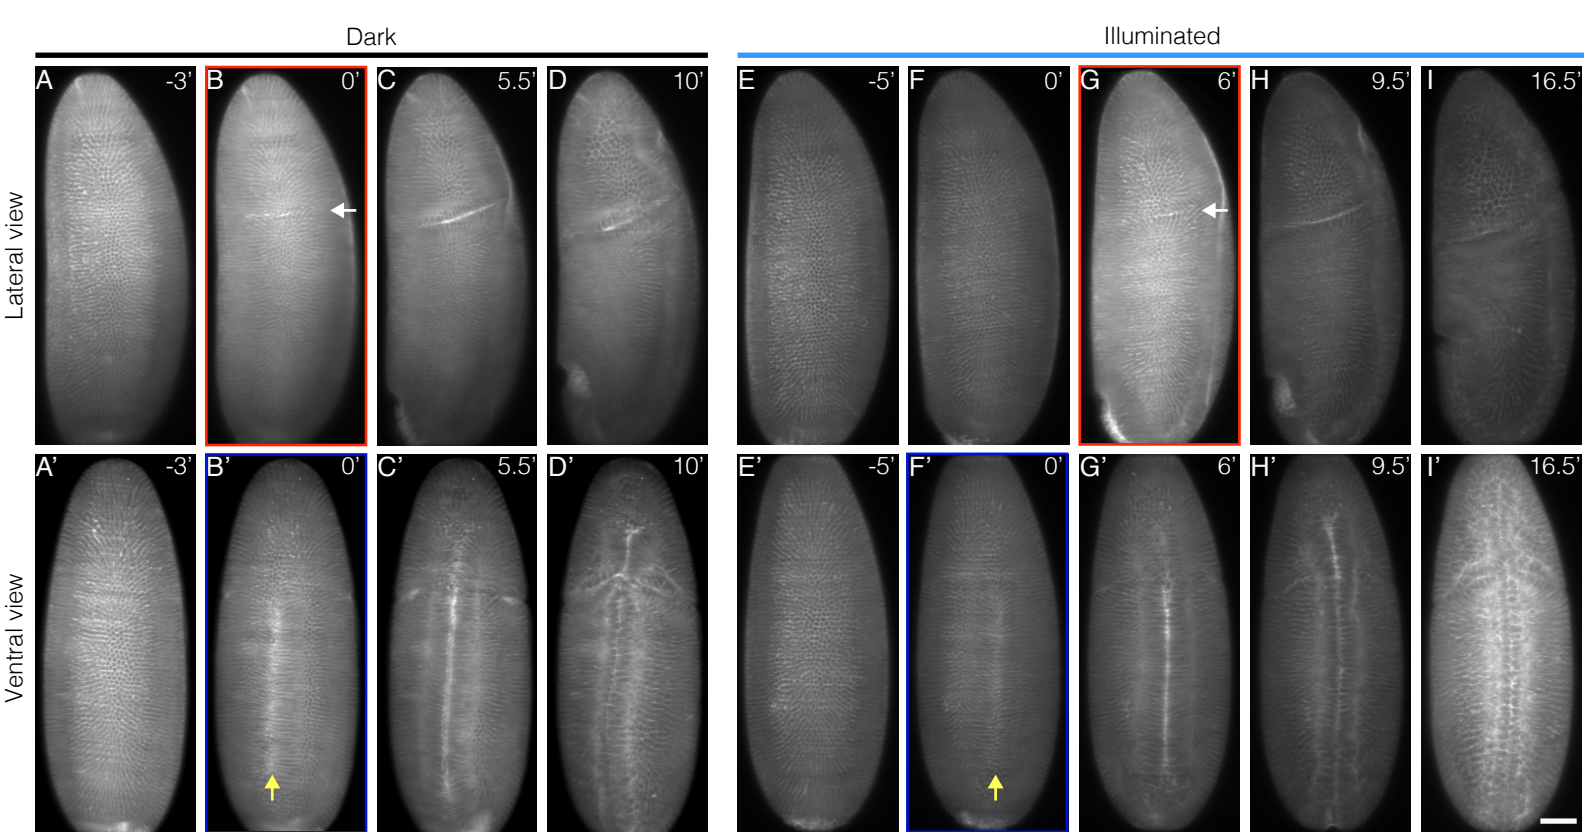

Supplement: supp [file elife-26258-supp-v1.zip]
